# Supplementary material for: Advancements in biofilm carriers and gas-permeable membranes: assessment of zeolite technologies for shortcut nitrogen removal applications in wastewater
Source: Royal Society of Chemistry journal article supplement (doi:10.1039/d3ew00211j), 2023-01-01
Supplement: d3ew00211j1.pdf [file d3ew00211j1.pdf]

## 1 Supplemental Information

2

### 3 Membrane Coating Methods.

4 *Attachment of zeolite procedure using UV (Attachment – UV method).* Faujasite zeolite nano particles  
5 were made using the following procedure. 1.1 g of  $\text{Na}_2\text{Al}_2\text{SO}_4$  (Sigma Aldrich) in 10 mL of water was  
6 mixed with 2.4 g of NaOH and 18.1 g of  $\text{Na}_2\text{SiO}_3$  solution (Sigma Aldrich) were chilled in an ice bath  
7 for 30 min. The  $\text{Na}_2\text{Al}_2\text{SO}_4$  mixture was added slowly added to  $\text{Na}_2\text{SiO}_3$ . After aging for 24 hours at  
8 room temperature, the mixture was freeze dried and then crystalized for 2 days at 50 °C. Solution  
9 was centrifuged, washed, and dried to produce a zeolite powder.

10

11 PSf membranes were prepared as described by Binahmed et al.<sup>2</sup> Zeolite was attached to the  
12 membranes using a similar procedure as described by Kulak et al.<sup>4</sup> Briefly, zeolite was dried for 24  
13 hours at 100 °C using a Schlenk Line (100 millitorr) and treated with 3-aminopropyltriethoxysilane  
14 (APTES) (2 mM) (Sigma Aldrich) in toluene for 1 hour at 70 °C under nitrogen. PSf membranes  
15 were irradiated with a UV lamp (Spetroline Model EF-160C) for 15 seconds to create carboxylic  
16 groups on the membrane surface and treated with [3-(2,3epoxypropoxylpropyl]-trimethoxysilane  
17 (GLYMO) (2 mM) (Sigma Aldrich) in iso-octane for 1 hour at room temperature under nitrogen.

18

19 The treated zeolite was dried at 70 °C overnight and resuspended in iso-octane and applied to the  
20 treated PSf membrane for 1 hour while mixing. Coated membranes were rinsed and sonicated for 20  
21 seconds to remove non-attached particles. Membranes were stored at 4 °C in deionized (DI) water.

22

23 *Attachment of zeolite procedure using UV and poly(acrylic acid (PAA) (Attachment – AA/UV*  
24 *method).* The previous procedure was modified to apply 10% acrylic acid (AA) solution from stock  
25 99% AA (Sigma Aldrich) in MilliQ to the PSf membrane immediately after membrane oxidation with

26 UV exposure for the growth of PAA and enhance the coverage of carboxylic groups on the membrane  
27 surface.<sup>3</sup> AA (10%) was applied for 5 minutes and immediately rinsed with MilliQ water. A more  
28 detailed procedure is described in Wuolo-Journey et al.<sup>3</sup> The procedure continued as described in the  
29 attachment procedure using UV.

30

31 *Attachment of zeolite procedure using EDC-NHS (Attachment – EDC/NHS).* Beginning with UV/AA  
32 treatment, this procedure then uses 4 mM 1-ethyl-3-(3-dimethylaminopropyl)carbodiimide  
33 hydrochloride (EDC) (Sigma Aldrich) and 10 mM N-hydroxysuccinimide (NHS) (Sigma Aldrich),  
34 adjusted to pH 5 with 10 mM MES (Sigma Aldrich) supplemented with 0.5 M NaCl. This solution is  
35 applied to PSf membrane while mixing at ambient conditions for one hour.<sup>3,5</sup> Membrane was then  
36 rinsed and zeolite applied as described above.

37

38 *Attachment of zeolite procedure using polydopamine coating (Attachment – PDA).* PSf membranes  
39 were prepared and stored as described earlier.<sup>2</sup> Dopamine solution was prepared using 4 g of 3,4-  
40 dihydroxyphenylalanine (DOPA) (Sigma Aldrich) in 1 L of Trizma buffer (10 mM) (Sigma  
41 Aldrich).<sup>2,8</sup> Once mixed, 50 mg of zeolite, prepared as described above, was added to the solution.  
42 The pH was adjusted to 8.5 using 1 M NaOH. Dopamine solution was immediately transferred to the  
43 membrane to initiate PDA deposition for 15 minutes while mixing. Membranes were then  
44 immediately rinsed thoroughly with MilliQ and stored in MilliQ at 4 °C.

45

46 *Embedment of zeolite into PSf membranes (Embedment).* PSf membranes were prepared as described  
47 previously.<sup>2</sup> 50 mg of zeolite nano powder (prepared as described previously) was added directly to  
48 the dope solution after solution was stored overnight to remove air bubbles. After the membranes  
49 were cast, they were stored in MilliQ at 4 °C until use.

50

51 *Growth of zeolite on alumina hollow fiber membranes (Growth).* Growth of faujasite zeolite on  
 52 alumina hollow fiber membranes (0.7 mm diameter) is described in previous work.<sup>7</sup> Briefly, raw  
 53 fibers of 38.0% N-Methyl-2-pyrrolidone (NMP), 6.8% polyethersulfone (PES), 54.7% Al<sub>2</sub>O<sub>3</sub>, and  
 54 05% polyvinylpyrrolidone (PVP) were sintered to make alumina hollow fiber membranes. Zeolite  
 55 growth on the membrane surface occurred by immersing in a solution of 7.7 M NaOH, colloidal silica  
 56 (Ludox TM-40, Sigma Alrich), and 0.15 of aluminum for 24 hours at 75 °C. Plain and zeolite-coated  
 57 membranes were stored dry in sterile containers at ambient conditions until use.

58

59 **Table S1. Synthetic wastewater components in mg per liter for CFTR and ACFTR**

|                                        | CFTR   | ACFTR  |    |
|----------------------------------------|--------|--------|----|
| NH <sub>4</sub> Cl                     | 133.75 | 133.75 | mg |
| NaNO <sub>2</sub>                      | 103.5  | 0      | mg |
| Magnesium Phosphate Dibasic Trihydrate | 25     | 25     | mg |
| Potassium Phosphate Tribasic           | 20     | 20     | mg |
| NaHCO <sub>3</sub>                     | 275    | 275    | mg |
| Sodium acetate                         | 221    | 221    | mg |
| Bacteriological peptone                | 24     | 24     | mg |
| Dry meat extract                       | 12     | 12     | mg |
| Potato starch                          | 42     | 42     | mg |
| Low fat milk powder                    | 50     | 50     | mg |
| Glycerine                              | 34     | 34     | mg |

60

61 **Table S2. Synthetic wastewater components in mg per liter for MFTR and Bioavailability Test**

|                    | MFTR   | Bioavailability Test |    |
|--------------------|--------|----------------------|----|
| NH <sub>4</sub> Cl | 133.75 | 0                    | mg |

|                                 |      |       |    |
|---------------------------------|------|-------|----|
| NaNO <sub>2</sub>               | 0    | 236.4 | mg |
| KH <sub>2</sub> PO <sub>4</sub> | 27.2 | 27.2  | mg |
| KHCO <sub>3</sub>               | 500  | 500   | mg |
| Trace solution 1                | 1    | 1     | mL |
| Trace solution 2                | 1    | 1     | mL |
| Mg solution                     | 1    | 1     | mL |
| Ca solution                     | 1    | 1     | mL |

62 †Trace solutions are detailed in Peterson et al.<sup>22</sup>

### 63 Table S3. Constants of isotherm equations

|                        |                                                      |
|------------------------|------------------------------------------------------|
| <b>q<sub>e</sub></b>   | Ammonium sorbed per unit mass of membrane or carrier |
| <b>q<sub>max</sub></b> | Maximum sorption capacity                            |
| <b>k</b>               | Adsorption equilibrium constant                      |
| <b>c<sub>f</sub></b>   | Concentration of ammonium in solution                |
| <b>k<sub>f</sub></b>   | Fruendlich constant                                  |
| <b>n</b>               | Empirical isotherm constant                          |

64

65

### 66 References

- 67 1. J. Gascon, F. Kapteijn, B. Zornoza, V. Sebastián, C. Casado and J. Coronas, Practical Approach  
68 to Zeolitic Membranes and Coatings: State of the Art, Opportunities, Barriers, and Future  
69 Perspectives, *Chemistry of Materials*, 2012, **24**, 2829-2844.
- 70 2. S. Binahmed, A. Hasane, Z. Wang, A. Mansurov and S. Romero-Vargas Castrillón, Bacterial  
71 Adhesion to Ultrafiltration Membranes: Role of Hydrophilicity, Natural Organic Matter, and  
72 Cell-Surface Macromolecules, *Environmental Science and Technology*, 2018, **52**, 162-172.
- 73 3. K. Wuolo-Journey, S. Binahmed, E. Linna and S. Romero-Vargas Castrillón, Do graphene oxide  
74 nanostructured coatings mitigate bacterial adhesion?, *Environmental Science: Nano*, 2019, **6**,  
75 2863-2875.

- 76 4. A. Kulak, Y.-J. Lee, Y. S. Park and K. B. Yoon, Orientation-Controlled Monolayer Assembly of  
77 Zeolite Crystals on Glass and Mica by Covalent Linkage of Surface-Bound Epoxide and Amine  
78 Groups, *Angewandte Chemie*, 2000, **112**, 980-983.
- 79 5. H. Croll, A. Soroush, M. E. Pillsbury and S. R.-V. Castrillón, Graphene oxide surface  
80 modification of polyamide reverse osmosis membranes for improved N-nitrosodimethylamine  
81 (NDMA) removal, *Separation and Purification Technology*, 2019, **210**, 973-980.
- 82 6. E. C. Feinberg, A. L. H. Chester, P. J. Novak and M. A. Hillmyer, Porous Polyethylene-  
83 Supported Zeolite Carriers for Improved Wastewater Deammonification, *ACS ES&T*  
84 *Engineering*, 2021, **1**, 1104-1112.
- 85 7. A. L. Huff Chester, K. Eum, M. Tsapatsis, M. A. Hillmyer and P. J. Novak, Enhanced Nitrogen  
86 Removal and Anammox Bacteria Retention with Zeolite-Coated Membrane in Simulated  
87 Mainstream Wastewater, *Environmental Science & Technology Letters*, 2021, **8**, 468-473.
- 88 8. J. Xue, S. Binahmed, Z. Wang, N. G. Karp, B. L. Stottrup and S. Romero-Vargas Castrillón,  
89 Bacterial Adhesion to Graphene Oxide (GO)-Functionalized Interfaces Is Determined by  
90 Hydrophobicity and GO Sheet Spatial Orientation, *Environmental Science & Technology Letters*,  
91 2018, **5**, 14-19.  
92
